# Supplementary material
Source: MDPI journal article supplement (https://www.mdpi.com/2624-5175/5/4/40)
Supplement: s1 [file s1]

**Table S1.** 95%CI and P values of all covariates in the results of multivariate regression analysis. .

|                      |                     | <b>Model 1</b> |                | <b>Model 2</b> |                | <b>Model 3</b> |                | <b>Model 4</b> |                |
|----------------------|---------------------|----------------|----------------|----------------|----------------|----------------|----------------|----------------|----------------|
|                      |                     | <b>95%CI</b>   | <b>p-value</b> | <b>95%CI</b>   | <b>p-value</b> | <b>95%CI</b>   | <b>p-value</b> | <b>95%CI</b>   | <b>p-value</b> |
| Sex                  |                     |                | 0.680          |                | 0.682          |                | 0.373          |                | 0.19           |
|                      | Men                 | Ref            |                | Ref            |                | Ref            |                | Ref            |                |
|                      | Women               | 0.79-1.43      |                | 0.76-1.54      |                | 0.81-1.75      |                | 0.87-1.98      |                |
| Age                  |                     |                | 0.001*         |                | 0.004*         |                | < 0.001*       |                | < 0.001*       |
|                      | 20-29               | Ref            |                | Ref            |                | Ref            |                | Ref            |                |
|                      | 30-39               | 0.57-1.29      |                | 0.47-1.16      |                | 0.42-1.10      |                | 0.43-1.17      |                |
|                      | 40-49               | 0.49-1.12      |                | 0.46-1.19      |                | 0.34-0.97      |                | 0.34-1.03      |                |
|                      | 50-59               | 0.33-0.77      |                | 0.30-0.82      |                | 0.18-0.57      |                | 0.18-0.59      |                |
|                      | ≥ 60                | 0.09-0.61      |                | 0.07-0.52      |                | 0.03-0.29      |                | 0.03-0.26      |                |
| living alone         |                     |                | 0.004*         |                | 0.008*         |                | 0.019*         |                | 0.250          |
|                      | No                  | Ref            |                | Ref            |                | Ref            |                | Ref            |                |
|                      | Yes                 | 1.15-2.09      |                | 1.12-2.14      |                | 1.07-2.17      |                | 0.86-1.80      |                |
| Telework frequency   |                     |                | 0.588          |                | 0.901          |                | 0.931          |                | 0.879          |
|                      | 1-3 d/m             | Ref            |                | Ref            |                | Ref            |                | Ref            |                |
|                      | 1-2 d/wk            | 0.58-1.28      |                | 0.58-1.36      |                | 0.57-1.39      |                | 0.65-1.65      |                |
|                      | 3-4 d/wk            | 0.52-1.13      |                | 0.56-1.31      |                | 0.57-1.36      |                | 0.58-1.46      |                |
|                      | ≥ 5 d/wk            | 0.51-1.21      |                | 0.52-1.40      |                | 0.51-1.43      |                | 0.49-1.46      |                |
| Teleworking place    |                     |                | 0.344          |                | 0.634          |                | 0.444          |                | 0.313          |
|                      | Living room         | Ref            |                | Ref            |                | Ref            |                | Ref            |                |
|                      | Private room        | 0.60-1.25      |                | 0.62-1.36      |                | 0.61-1.37      |                | 0.53-1.25      |                |
|                      | Bedroom             | 0.65-1.32      |                | 0.65-1.38      |                | 0.57-1.25      |                | 0.48-1.09      |                |
|                      | Others              | 0.86-2.31      |                | 0.79-2.31      |                | 0.80-2.44      |                | 0.67-2.19      |                |
| Teleworking duration |                     |                | 0.786          |                | 0.659          |                | 0.730          |                | 0.840          |
|                      | < 1 y               | Ref            |                | Ref            |                | Ref            |                | Ref            |                |
|                      | ≥ 1 y and < 1.5 y   | 0.74-1.73      |                | 0.78-1.93      |                | 0.76-1.93      |                | 0.71-1.89      |                |
|                      | ≥ 1.5 y             | 0.69-1.55      |                | 0.72-1.71      |                | 0.73-1.80      |                | 0.69-1.76      |                |
| Occupation           |                     |                |                |                | 0.210          |                | 0.187          |                | 0.167          |
|                      | Clerks              |                |                | Ref            |                | Ref            |                | Ref            |                |
|                      | Engineers           |                |                | 0.77-2.12      |                | 0.82-2.34      |                | 0.80-2.42      |                |
|                      | Field workers       |                |                | 0.65-3.31      |                | 0.62-3.40      |                | 0.57-3.35      |                |
|                      | Creators            |                |                | 0.43-1.66      |                | 0.38-1.58      |                | 0.40-1.77      |                |
|                      | Customer service    |                |                | 0.55-2.75      |                | 0.55-2.87      |                | 0.48-2.74      |                |
|                      | Sales               |                |                | 0.97-2.48      |                | 0.93-2.53      |                | 0.97-2.73      |                |
|                      | Others              |                |                | 0.28-1.46      |                | 0.27-1.46      |                | 0.25-1.41      |                |
| Employment position  |                     |                |                |                | 0.006*         |                | 0.015*         |                | 0.028*         |
|                      | Manager or Director |                |                | Ref            |                | Ref            |                | Ref            |                |

|                                                        |           |          |           |          |           |          |
|--------------------------------------------------------|-----------|----------|-----------|----------|-----------|----------|
| Chief                                                  | 0.40-0.98 |          | 0.39-0.99 |          | 0.42-1.11 |          |
| Supervisor                                             | 0.31-0.83 |          | 0.31-0.89 |          | 0.31-0.94 |          |
| Regular Employee                                       | 0.11-0.76 |          | 0.11-0.82 |          | 0.09-0.78 |          |
| Work hours past 1 month                                |           | 0.144    |           | 0.149    |           | 0.147    |
| < 160 h/m                                              | Ref       |          | Ref       |          | Ref       |          |
| ≧ 160 and < 200 h/m                                    | 0.52-1.02 |          | 0.51-1.02 |          | 0.49-1.03 |          |
| ≧ 200 h/m                                              | 0.60-1.44 |          | 0.58-1.44 |          | 0.58-1.49 |          |
| Job stressors and social supports                      |           |          |           |          |           |          |
| Job demands                                            | 1.08-1.29 | < 0.001* | 1.07-1.27 | 0.001*   | 1.03-1.24 | 0.011*   |
| Job control                                            | 0.67-0.81 | < 0.001* | 0.69-0.83 | < 0.001* | 0.7-0.85  | < 0.001* |
| Supervisor support                                     | 0.85-1.01 | 0.089    | 0.84-1.01 | 0.072    | 0.86-1.03 | 0.196    |
| Coworker support                                       | 0.80-0.95 | 0.002*   | 0.82-0.99 | 0.023*   | 0.84-1.02 | 0.112    |
| Commuting time                                         |           |          |           | 0.163    |           | 0.115    |
| < 60 min                                               |           |          | Ref       |          | Ref       |          |
| ≧ 60min                                                |           |          | 0.90-1.85 |          | 0.93-1.98 |          |
| Means of commuting                                     |           |          |           | 0.040*   |           | 0.208    |
| Crowded train                                          |           |          | Ref       |          | Ref       |          |
| Uncrowded train                                        |           |          | 0.50-1.51 |          | 0.56-1.81 |          |
| On foot                                                |           |          | 0.51-1.40 |          | 0.57-1.65 |          |
| Others                                                 |           |          | 0.97-3.32 |          | 0.90-3.30 |          |
| Exercise habits                                        |           |          |           | 0.851    |           | 0.838    |
| Not physically active<br>and no intention to<br>change |           |          | Ref       |          | Ref       |          |
| Not active but intending<br>to change                  |           |          | 0.72-2.10 |          | 0.70-2.15 |          |
| Doing some activity but<br>not enough                  |           |          | 0.68-1.94 |          | 0.60-1.79 |          |
| Regularly active but not<br>the habit                  |           |          | 0.72-2.52 |          | 0.68-2.52 |          |
| Regularly active in the<br>habit                       |           |          | 0.56-1.95 |          | 0.57-2.12 |          |
| Drinking alcohol                                       |           |          |           | 0.090    |           | 0.026*   |
| Never or rarely                                        |           |          | Ref       |          | Ref       |          |
| less than 2 d/wk                                       |           |          | 0.63-1.32 |          | 0.60-1.30 |          |
| 3-6 d/wk                                               |           |          | 0.35-0.88 |          | 0.30-0.78 |          |
| everyday                                               |           |          | 0.51-1.29 |          | 0.44-1.16 |          |
| Taking caffeine                                        |           |          |           | 0.542    |           | 0.57     |
| Never or rarely                                        |           |          | Ref       |          | Ref       |          |
| 2-6 d/wk                                               |           |          | 0.52-1.70 |          | 0.51-1.77 |          |

|                                             |           |           |          |
|---------------------------------------------|-----------|-----------|----------|
| Everyday but less than<br>twice a day       | 0.51-1.52 | 0.54-1.69 |          |
| Everyday and more than<br>three times a day | 0.65-2.05 | 0.67-2.26 |          |
| Current smoking                             |           | 0.044*    | 0.031*   |
| No                                          | Ref       | Ref       |          |
| Yes                                         | 1.01-2.04 | 1.04-2.19 |          |
| Using electronic terminal outside work      |           | 0.598     | 0.087    |
| < 2 h/d                                     | Ref       | Ref       |          |
| ≧ 2 h/d                                     | 0.67-1.26 | 0.54-1.04 |          |
| Enjoying leisure time                       |           | < 0.001*  | < 0.001* |
| Yes                                         | Ref       | Ref       |          |
| No                                          | 2.17-4.09 | 1.80-3.51 |          |
| Sleep duration                              |           |           | 0.002*   |
| ≧ 7 h                                       |           | Ref       |          |
| < 7 h                                       |           | 0.41-0.82 |          |
| AIS score                                   |           |           | < 0.001* |
| < 6                                         |           | Ref       |          |
| ≧ 6                                         |           | 3.70-7.31 |          |

**Abbreviations:** CI: confidence interval, Ref: reference, AIS: Athens Insomnia Scale.

\* Significant difference by multiple logistic regression.
